# Supplementary material for: GLYI and D-LDH play key role in methylglyoxal detoxification and abiotic stress tolerance
Source: PubMed Central journal article supplement (PMC5883029; doi:10.1038/s41598-018-23806-4), 2018-04-03
Supplement: 41598_2018_23806_MOESM1_ESM.pdf [file 41598_2018_23806_MOESM1_ESM.pdf]

1 **GLYI and D-LDH play key role in methylglyoxal detoxification and**  
2 **abiotic stress tolerance**

3 **Muskan Jain<sup>1</sup>, Preeti Nagar<sup>1</sup>, Ayush Sharma<sup>1</sup>, Rituraj Batth<sup>1</sup>, Sakshi Aggarwal<sup>1</sup>, Sumita**  
4 **Kumari<sup>2</sup>, Ananda Mustafiz<sup>1\*</sup>**

5 **<sup>1</sup> Faculty of Life Sciences and Biotechnology, Laboratory of Plant Molecular Biology, South**  
6 **Asian University, Akbar Bhawan, Chanakyapuri, New Delhi 110021, India**

7 **<sup>2</sup>School of Biotechnology, Sher-e-Kashmir University of Agricultural Sciences and**  
8 **Technology, Jammu 180009, India**

9 **\* Corresponding author**

10 **Email: [amustafiz@sau.ac.in](mailto:amustafiz@sau.ac.in)**

**Supplementary Table S1: A list of primers used in the study**

| <b>S. No.</b> | <b>Primer Name</b> | <b>Primer Sequence</b>                 |
|---------------|--------------------|----------------------------------------|
| 1.            | AtGLYI<br>EcoRI-F  | GGAATTCATGGCGTCGGAAGCGAGGGAATC         |
| 2.            | AtGLYI XhoI-R      | CCGCTCGAGTCAAGCTGCGTTTACGGTAGTAGTT     |
| 3.            | AtGLYII<br>EcoRI-F | GGAATTCATGAAGATCTTCCACGTTCCCTTGTCTG    |
| 4.            | AtGLYII<br>XhoI-R  | CCGCTCGAGTCATCCCCTCCACTGATCCTTCTT      |
| 5.            | AtD-LDH<br>EcoRI-F | GGAATTCATGGCTTTCGCTTCAAATTCGCT         |
| 6.            | AtD-LDH<br>NotI-R  | TTGCGGCCGCTTAGAAACATACATGAGGAGGAATTAAC |
